# Supplementary material
Source: PubMed Central journal article supplement (PMC4047469)
Supplement: supp_M113.034173_mcp.M113.034173-1.pdf [file supp_M113.034173_mcp.M113.034173-1.pdf]

Quantitative chemical proteomics identifies novel targets of the anti-cancer  
multi-kinase inhibitor E-3810

Colzani et al.

Supplemental Figures and Tables

Supplementary Figure S1

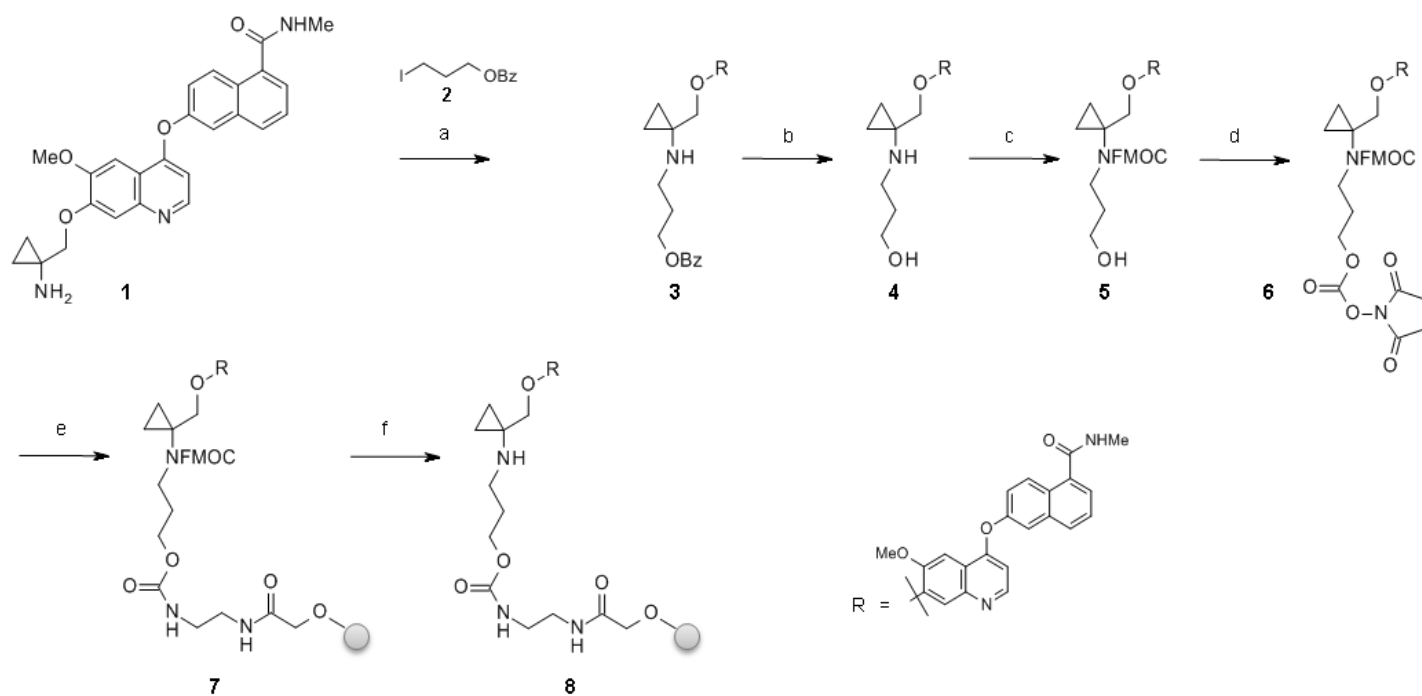

## Supplementary Figure S2

**A**

| Cell line  | FRGF2 gene copy number | FGFR2 mRNA level (fold change vs HUVECs) | E3810 IC <sub>50</sub> (μM) |
|------------|------------------------|------------------------------------------|-----------------------------|
| MDA-MB-134 | 3                      | 142                                      | 16 ± 8                      |
| MDA-MB-231 | 2                      | n.d.                                     | 38 ± 6                      |
| A2780      | 2                      | 106                                      | 8 ± 2                       |
| OVCA-432   | 2                      | 1106                                     | 19 ± 2                      |
| OVCAR-8    | 8                      | n.d.                                     | 7 ± 3                       |

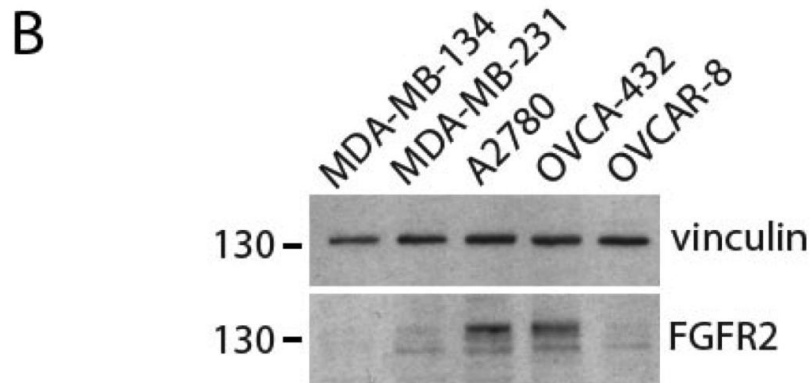

Supplementary Figure S3

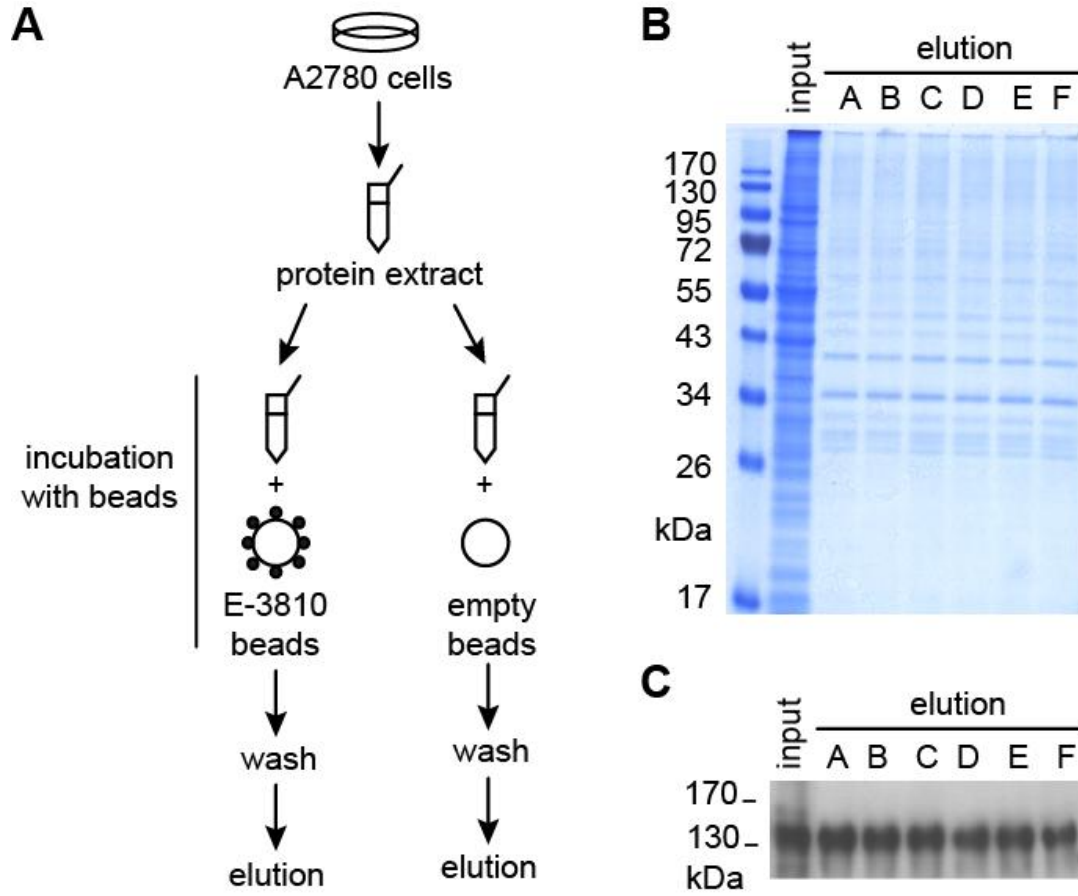

# Supplementary Figure S4

**A**

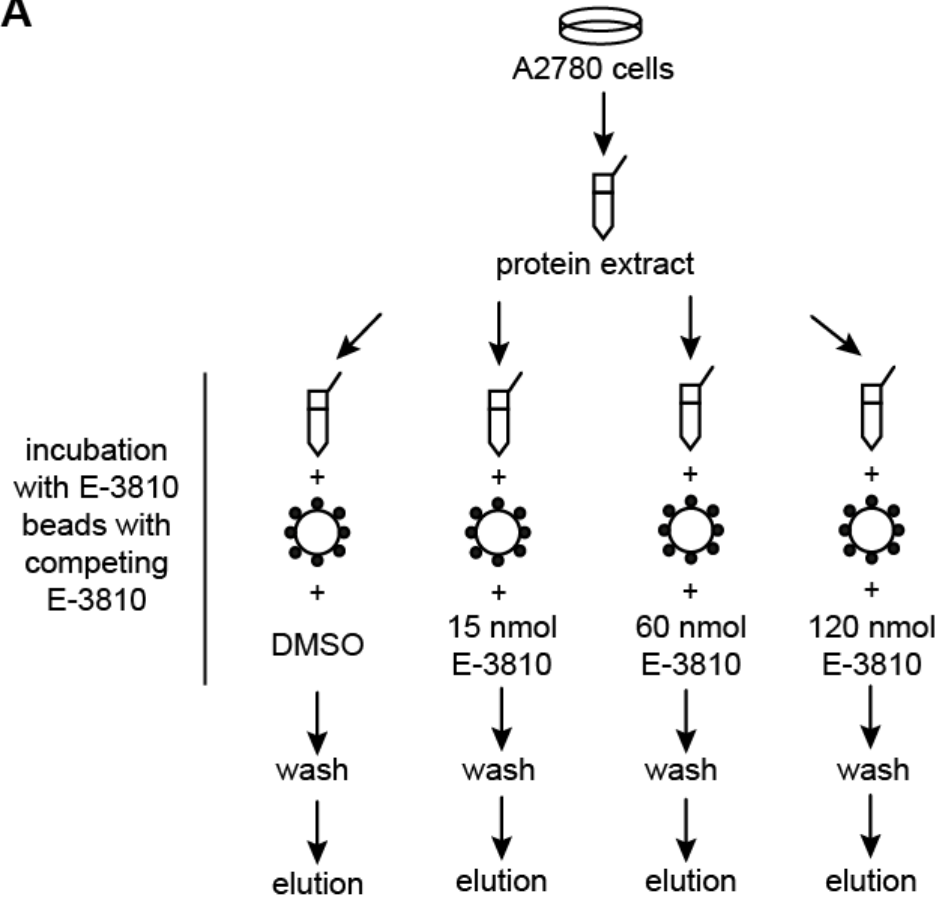

**B**

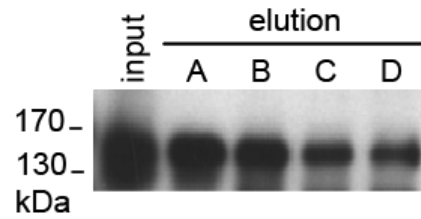

### Supplementary figure S5

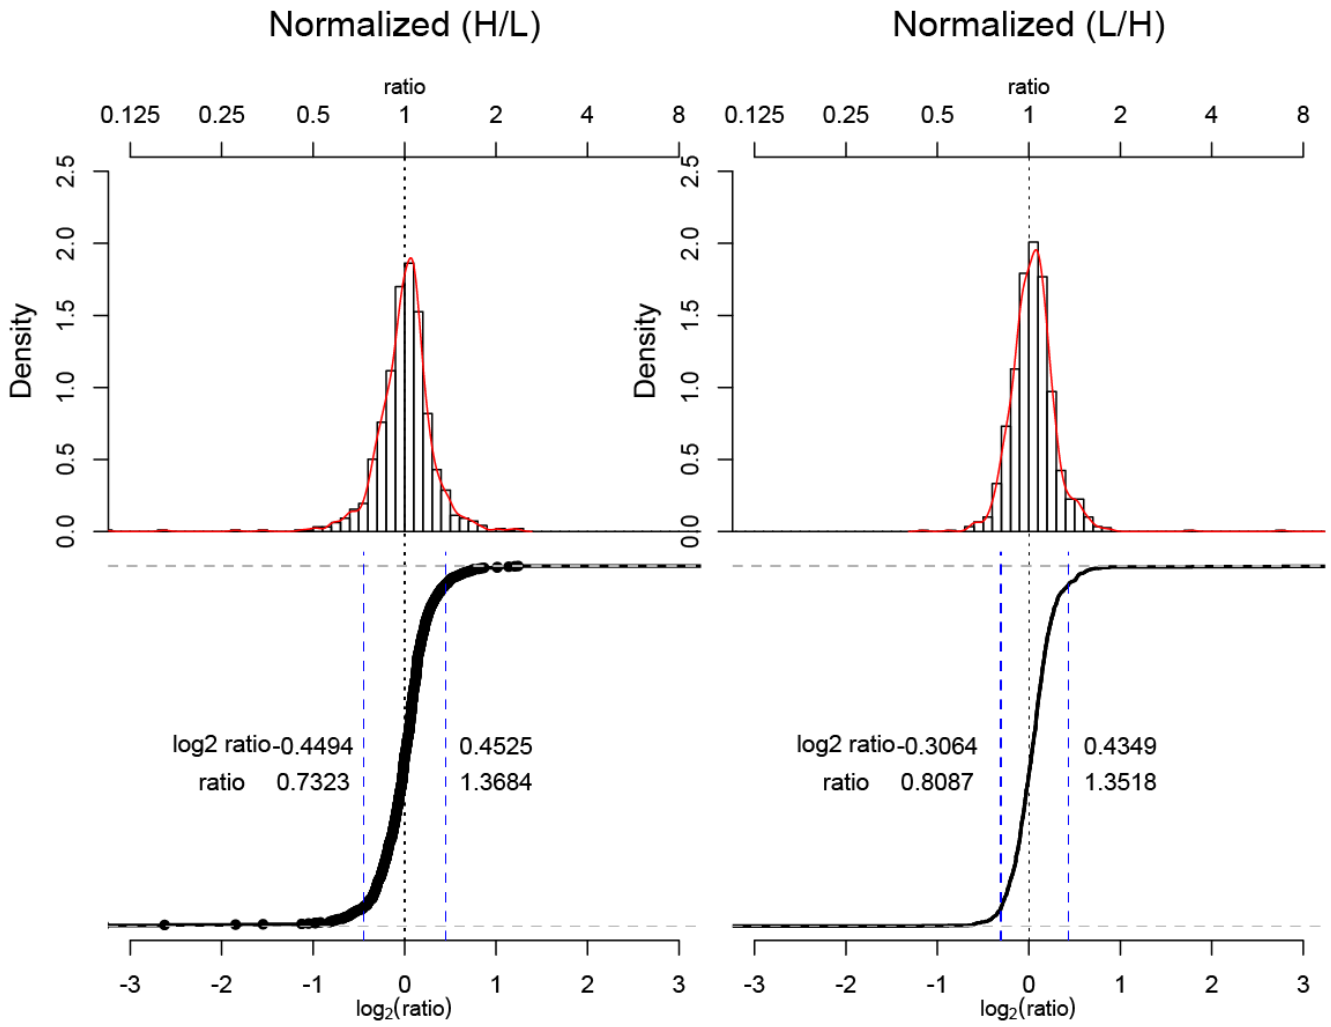

## Supplementary Figure S6

**A**

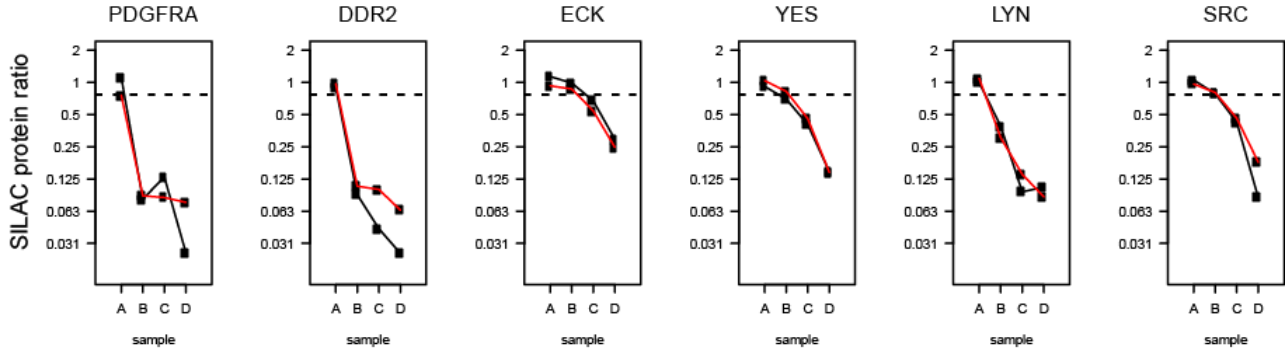

**B**

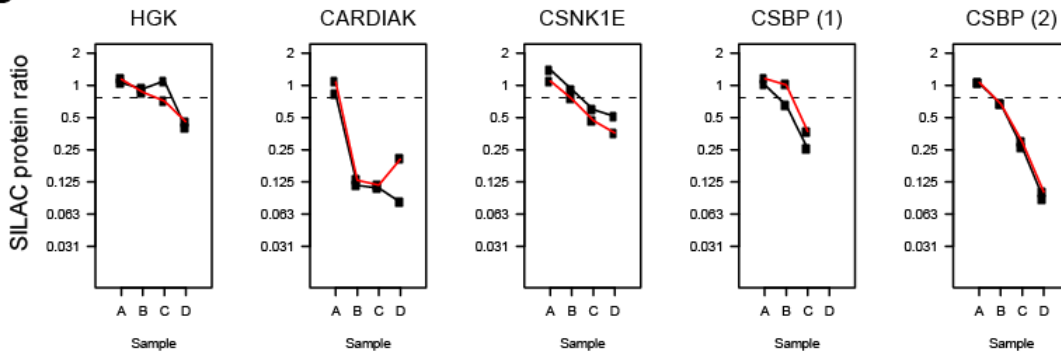

**C**

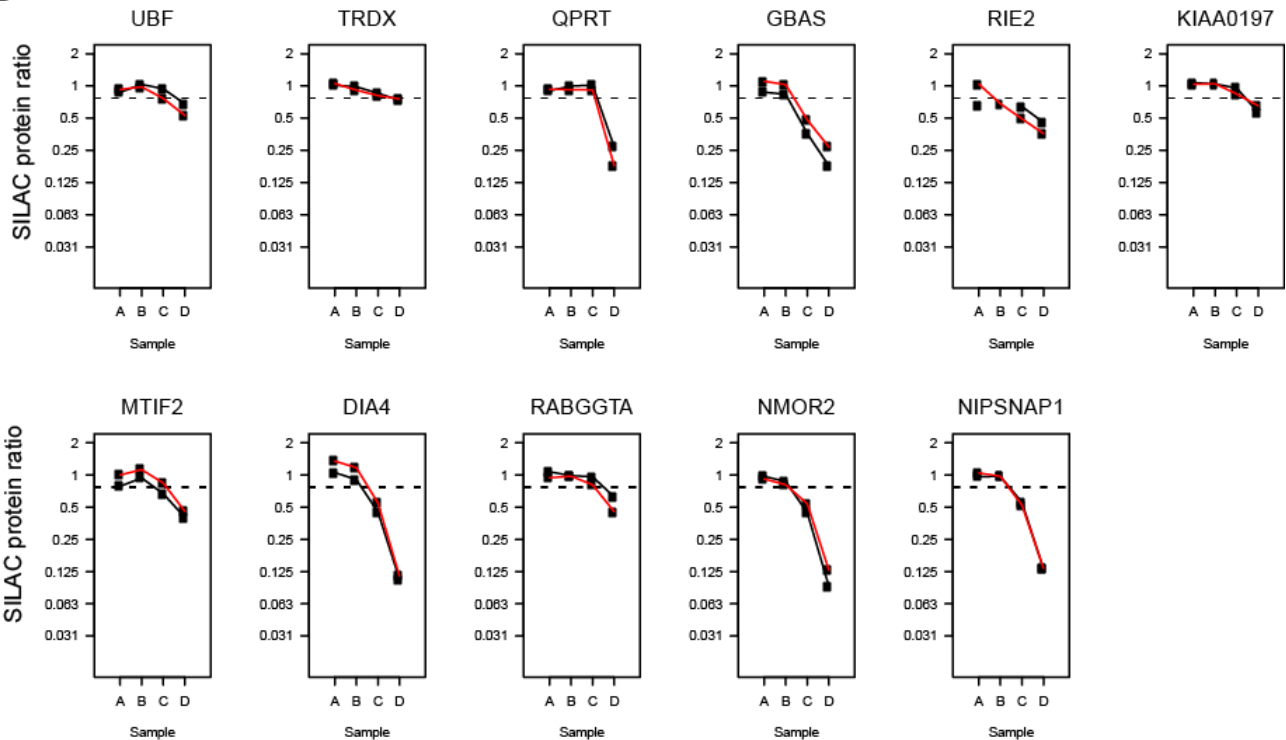

### Supplementary Figure S7

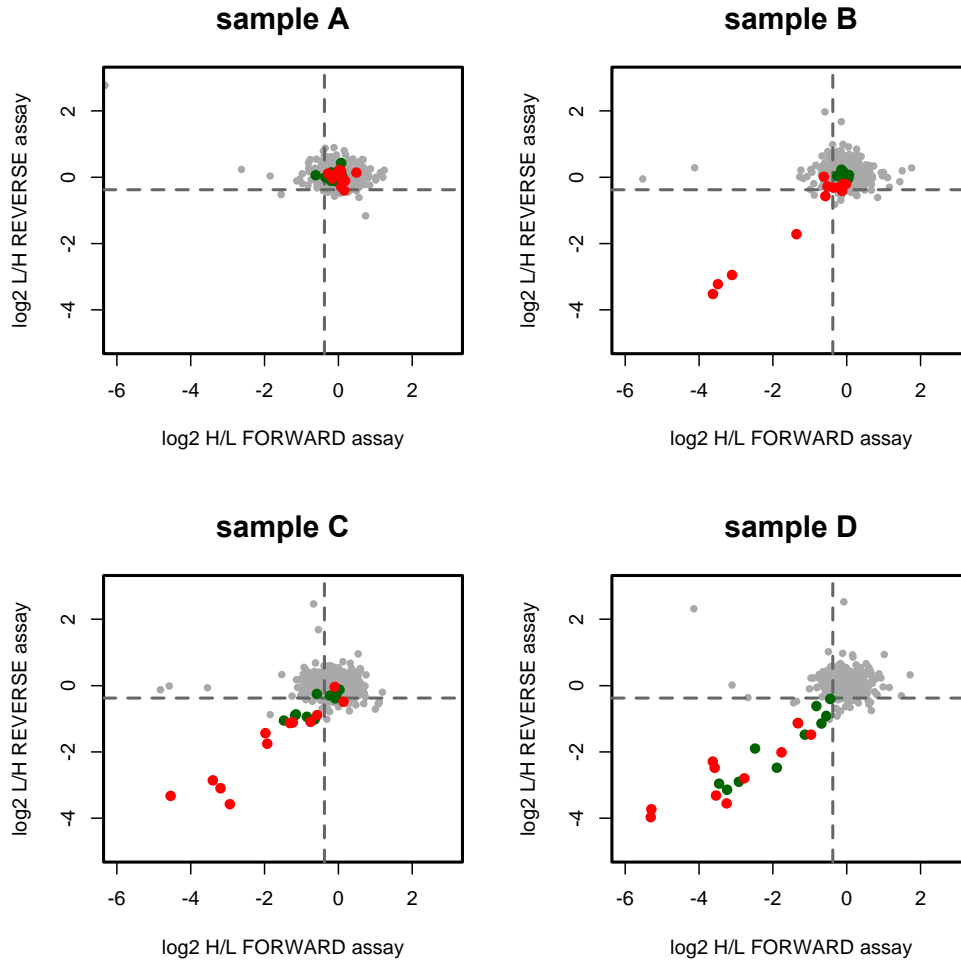

### Supplementary Figure S8

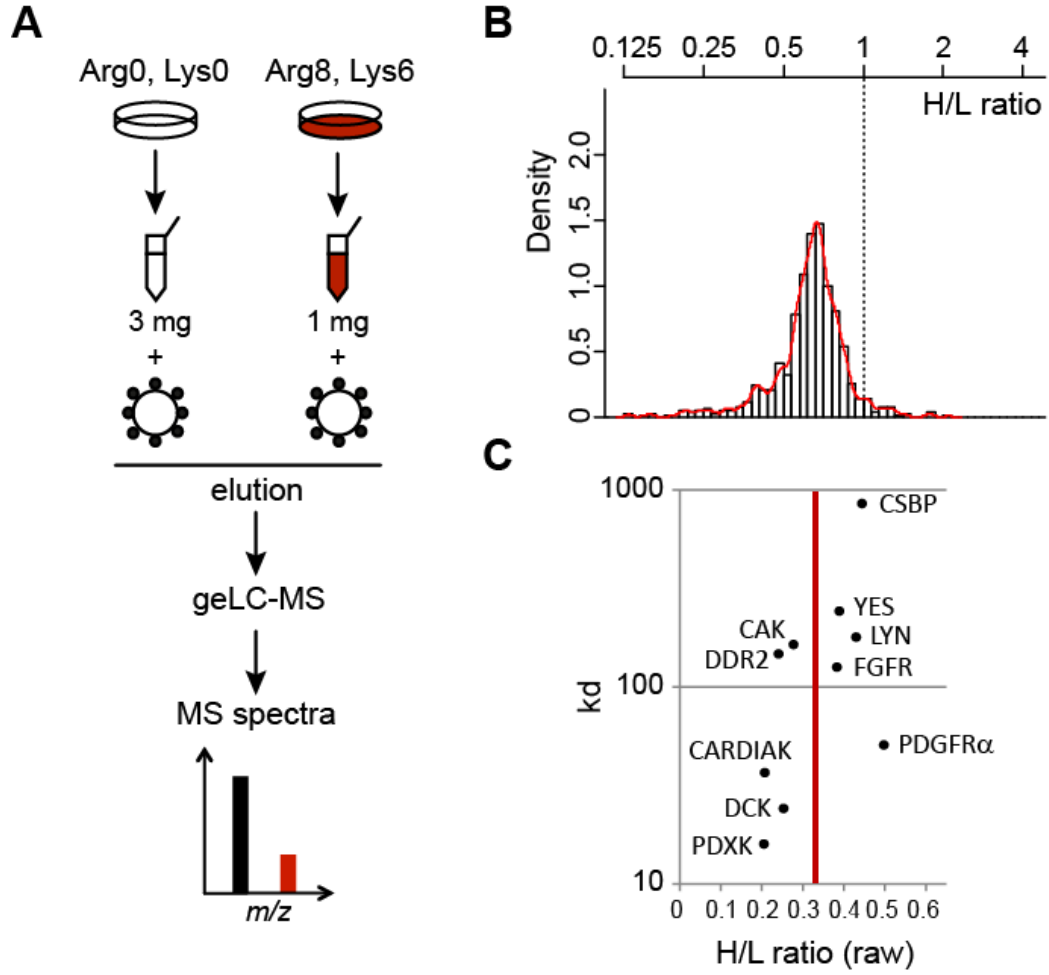



### Supplementary Figure S9

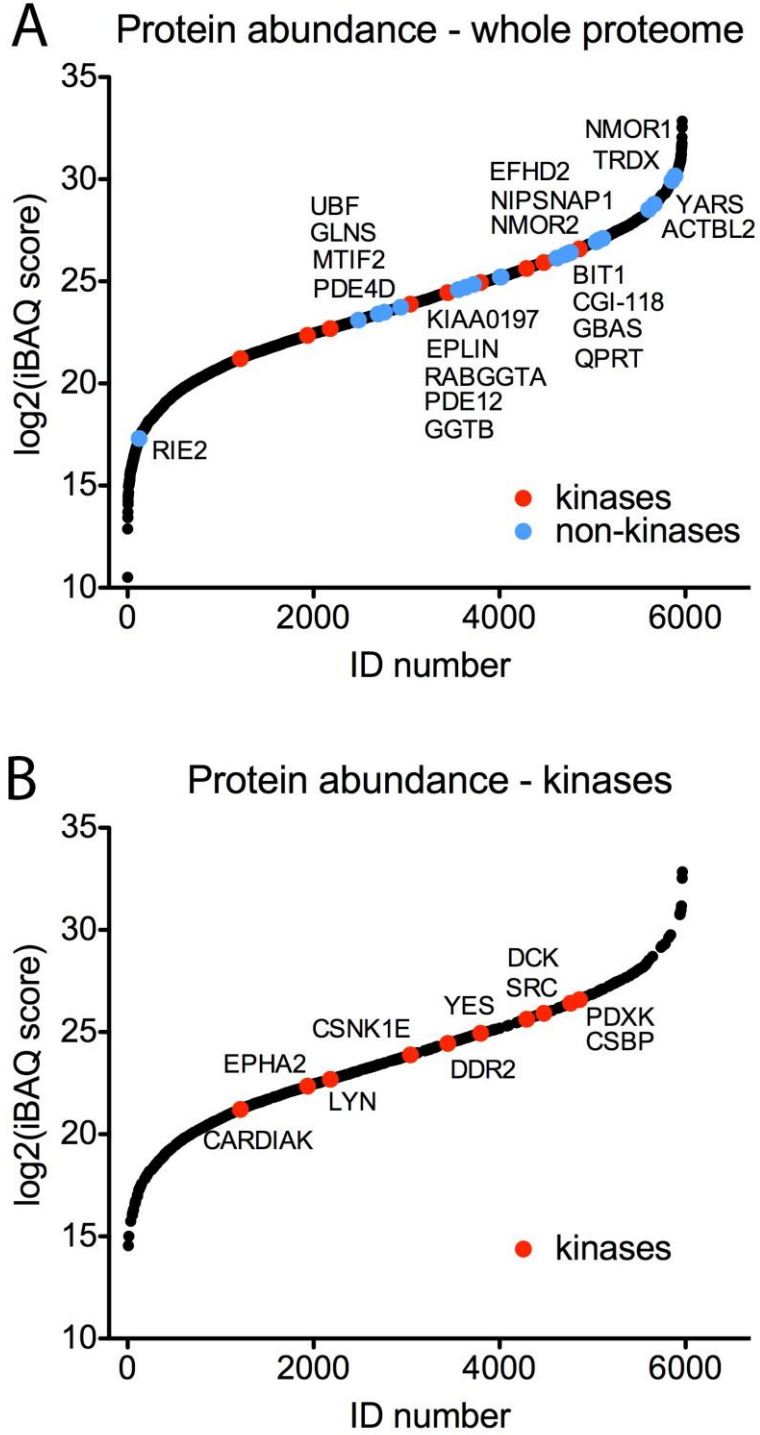

**Supplementary Figure S10**

Fragmentation spectra pages 11-12

**Supplementary Figure S11**

Fragmentation spectra pages 13-15

MS/MS spectrum

Source: F110425\_MC\_e3810\_silac2\_B05

Protein: LYN

Peptide Score: 134.04

Method: ITMS; CID; 2

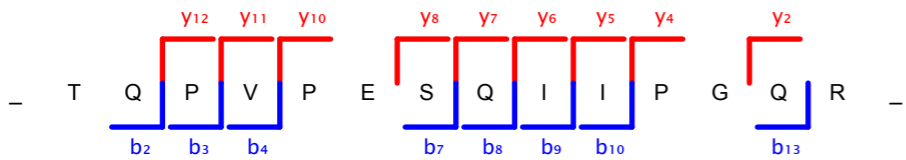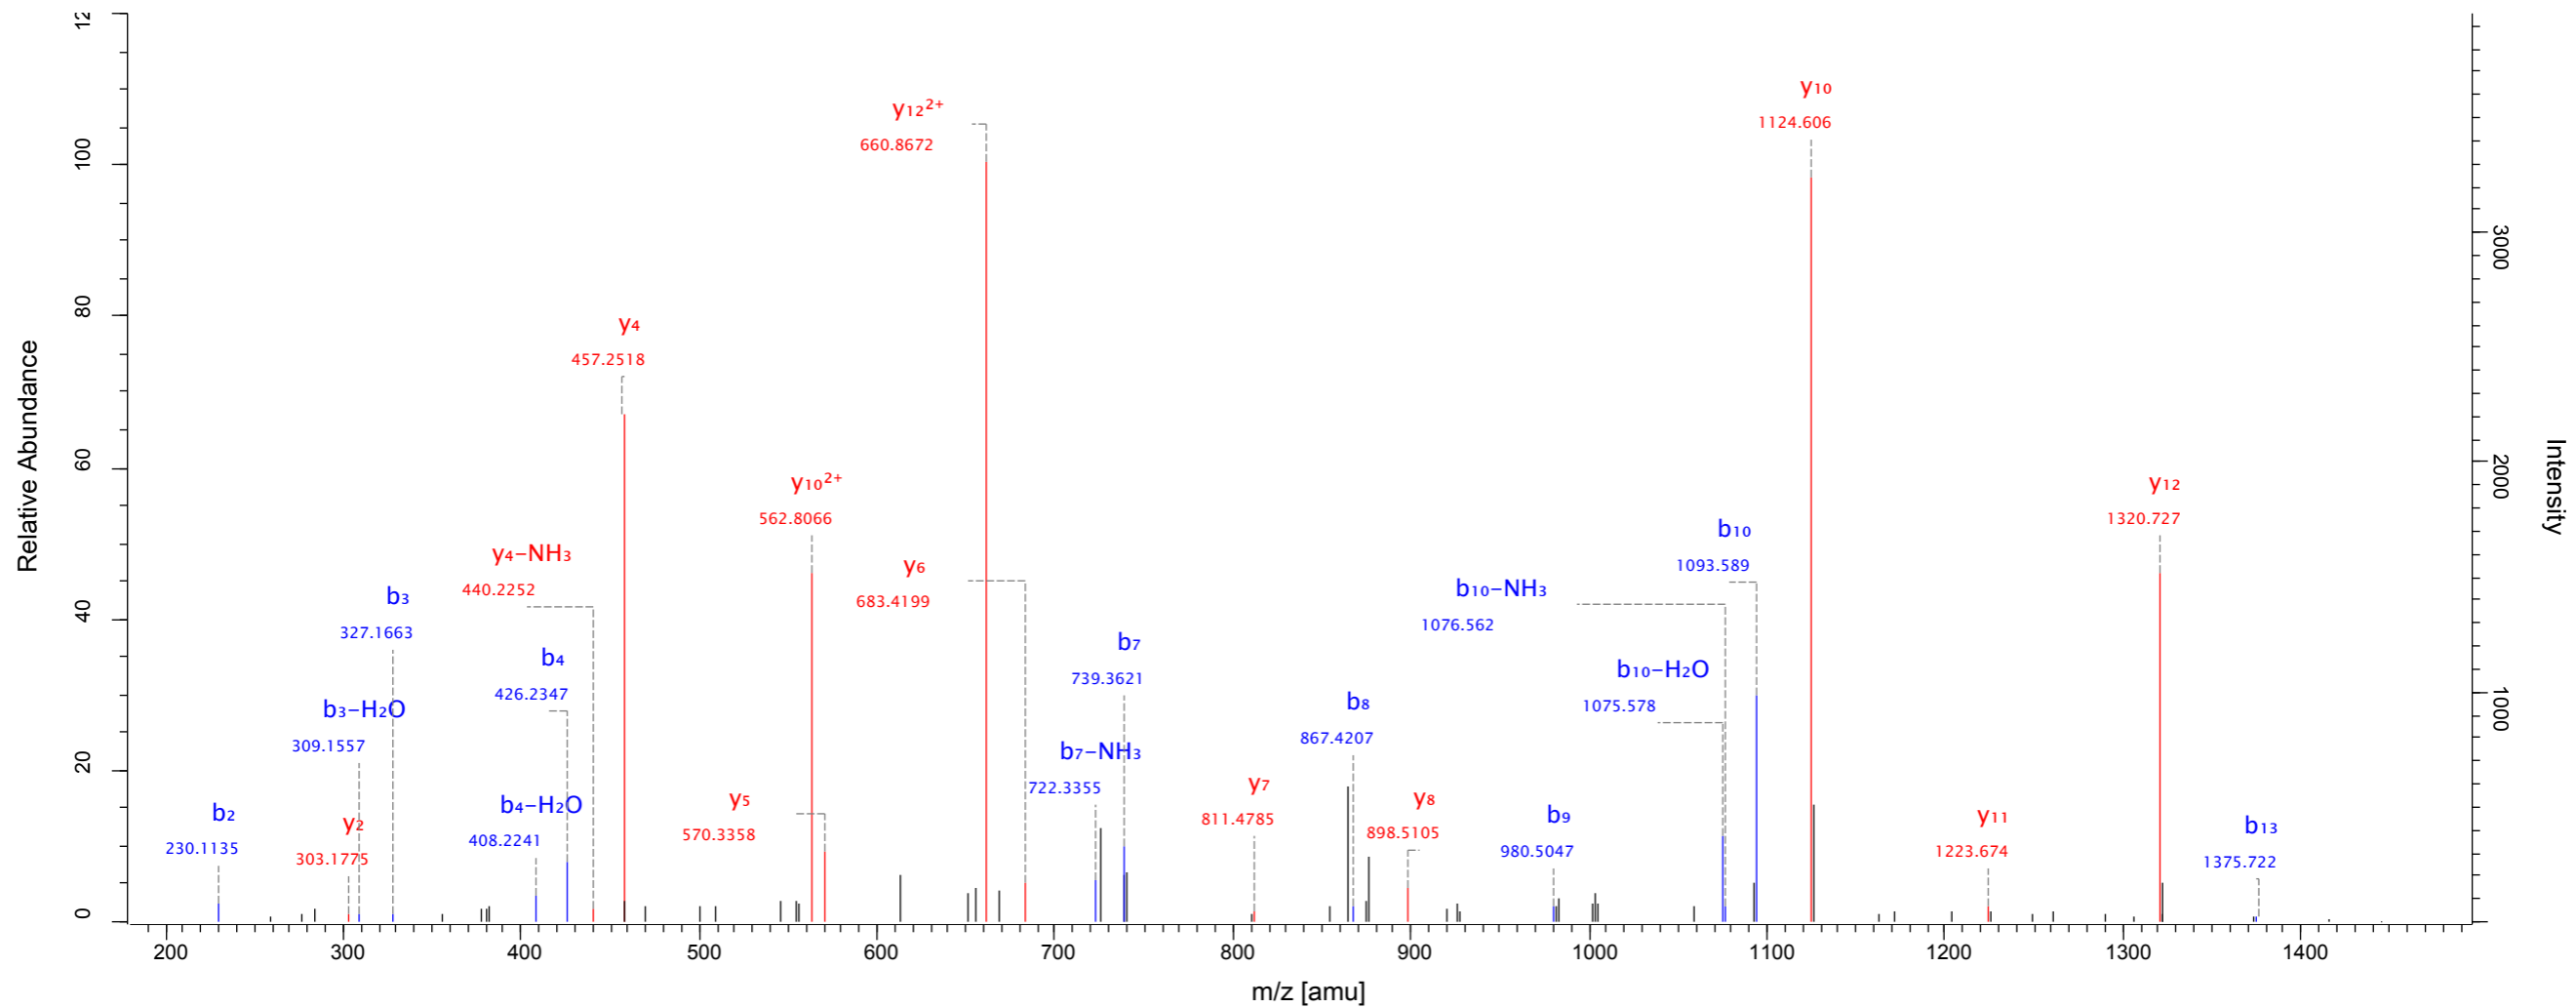

MS/MS spectrum

Source: F110530\_MC\_E3810\_A2780\_REV\_A05

Protein: CSBP

Peptide Score: 106.62

Method: ITMS; CID; 2

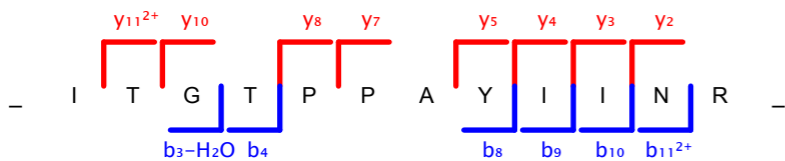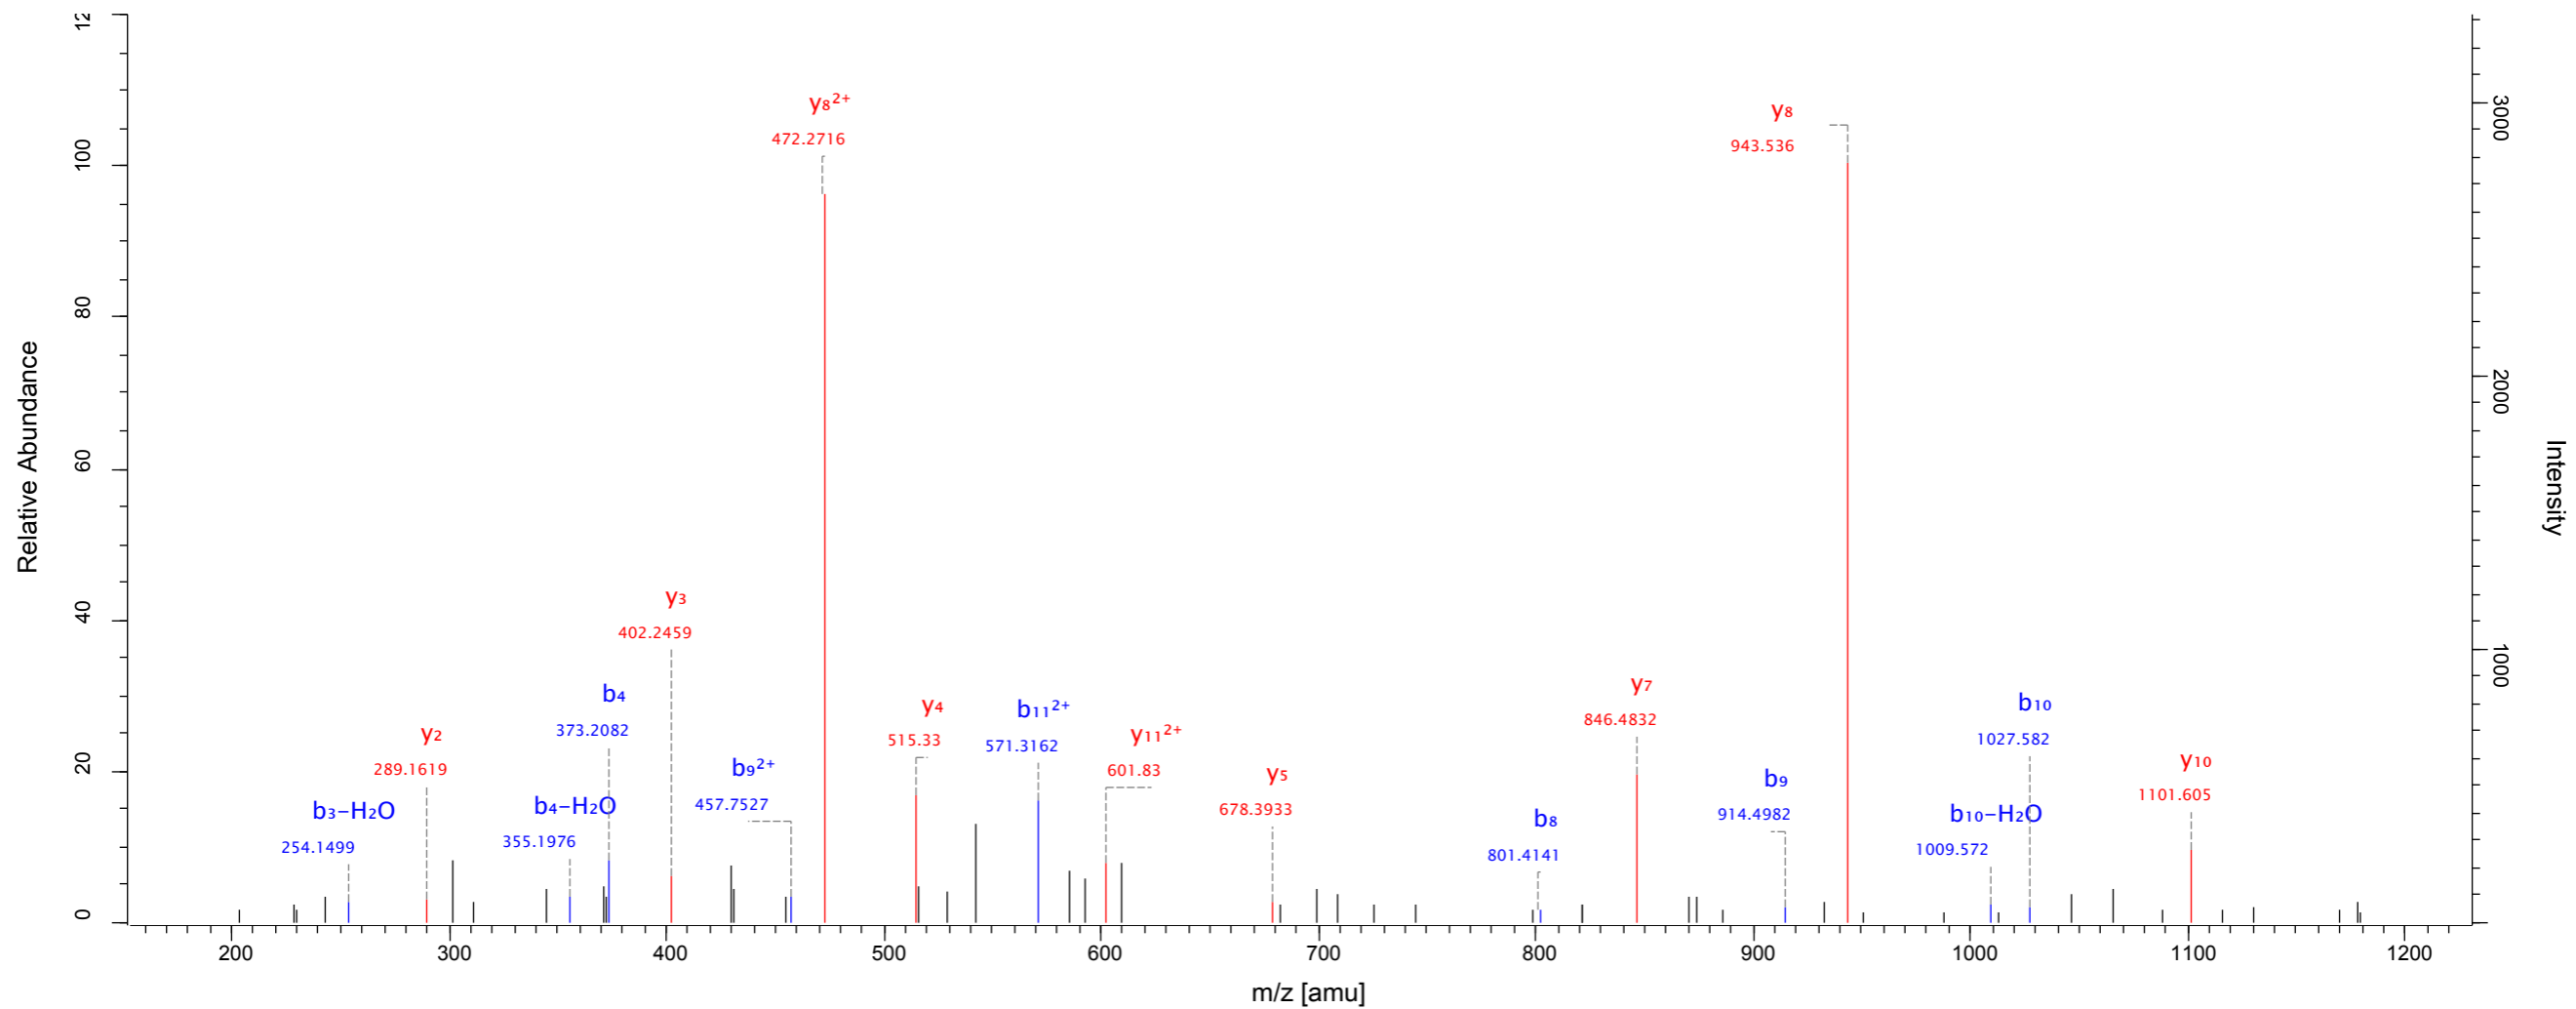

MS/MS spectrum

Source: F120118\_MC\_A2780\_DIR3  
Protein: FGFR2  
Peptide Score: 111.61  
Method: ITMS; CID; 3

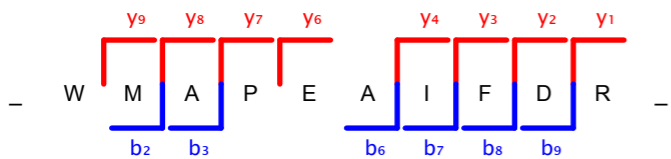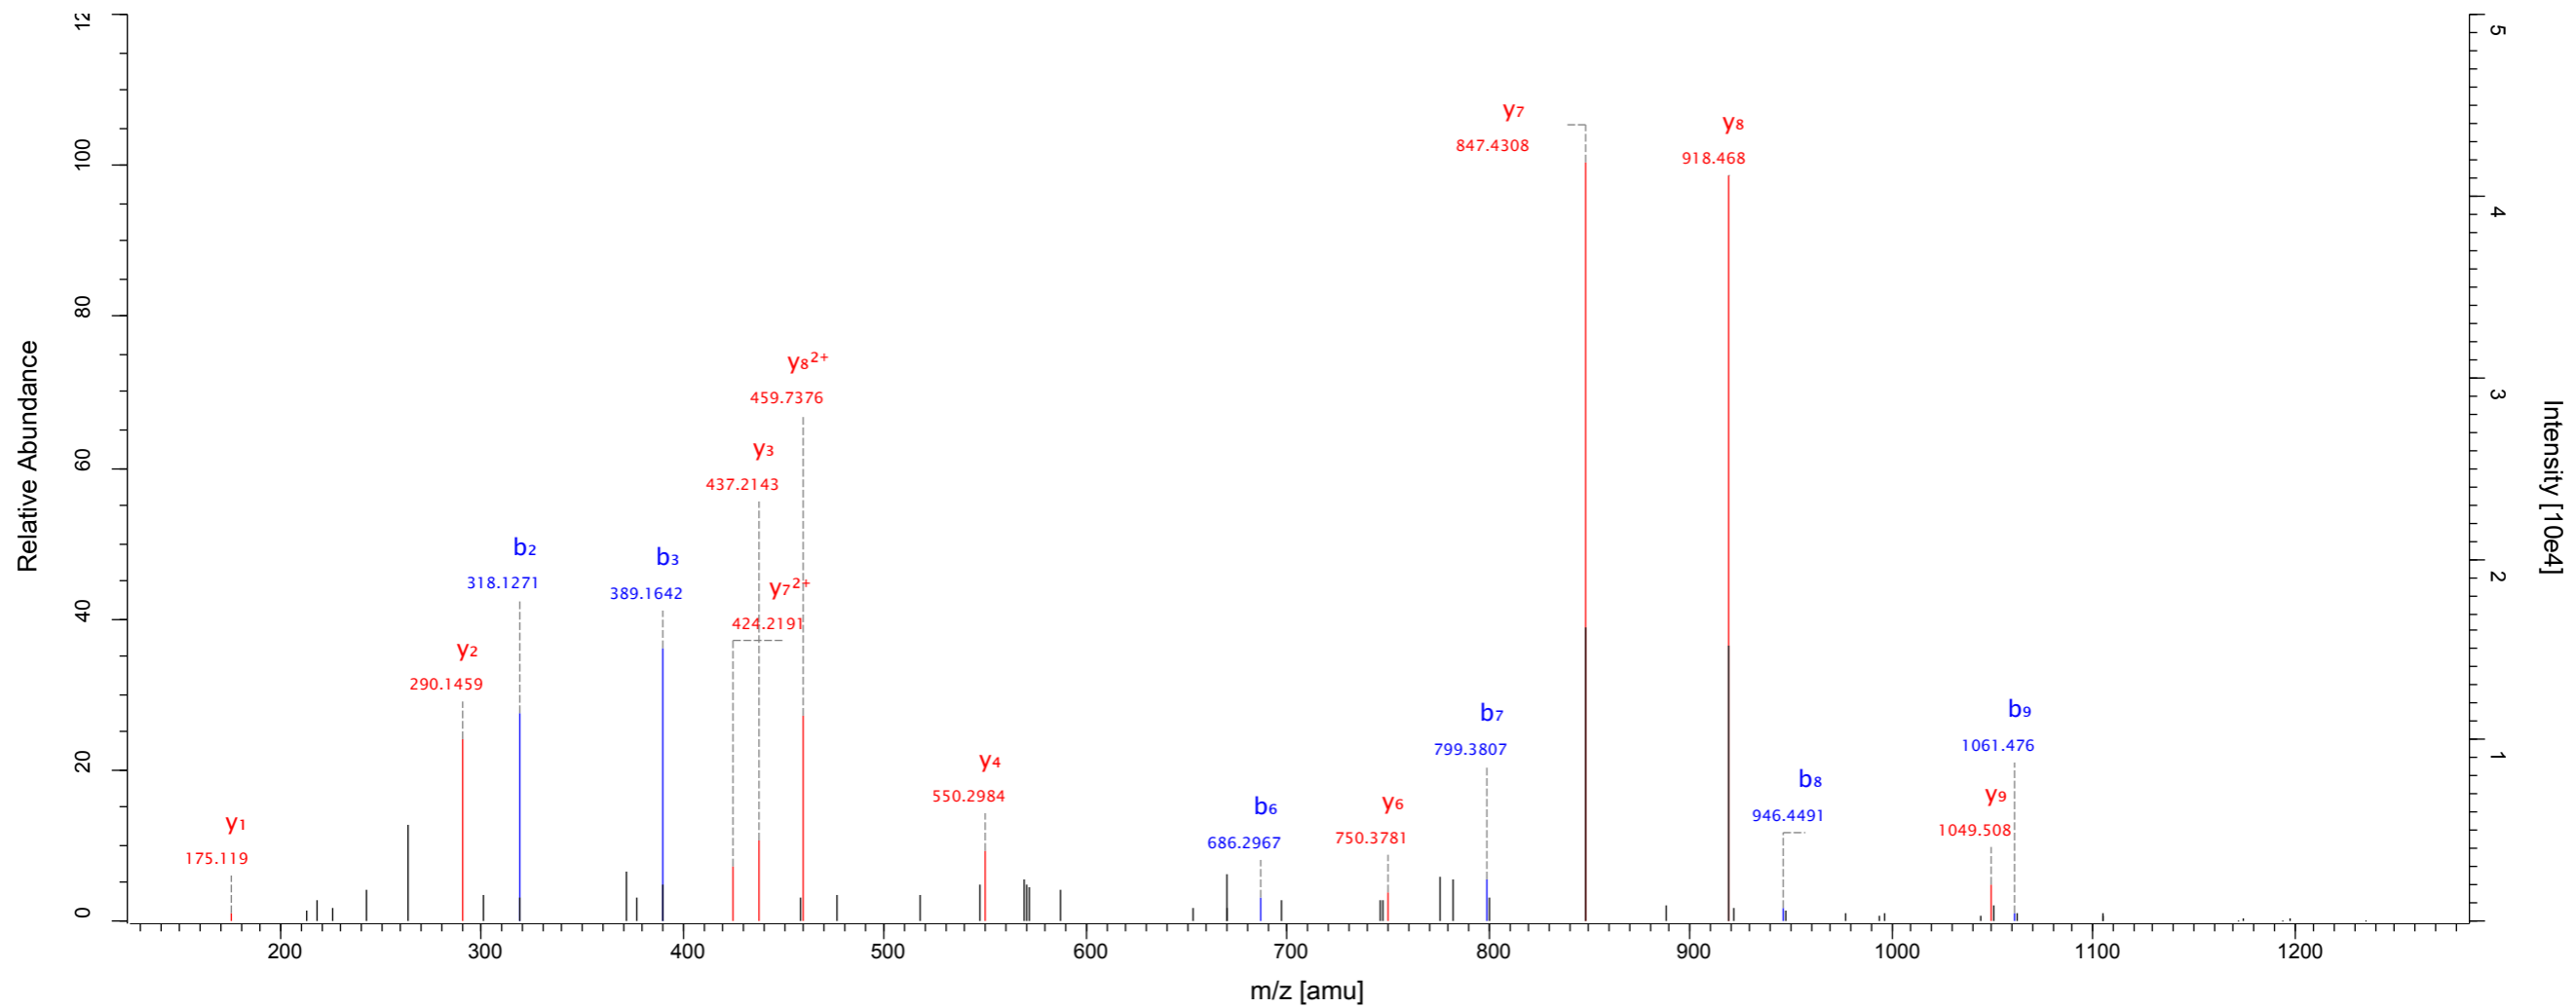

MS/MS spectrum

Source: F120118\_MC\_A2780\_REV7  
Protein: ACTBL2  
Peptide Score: 147.35  
Method: ITMS; CID; 3

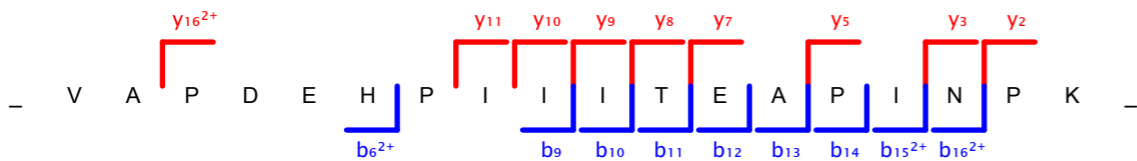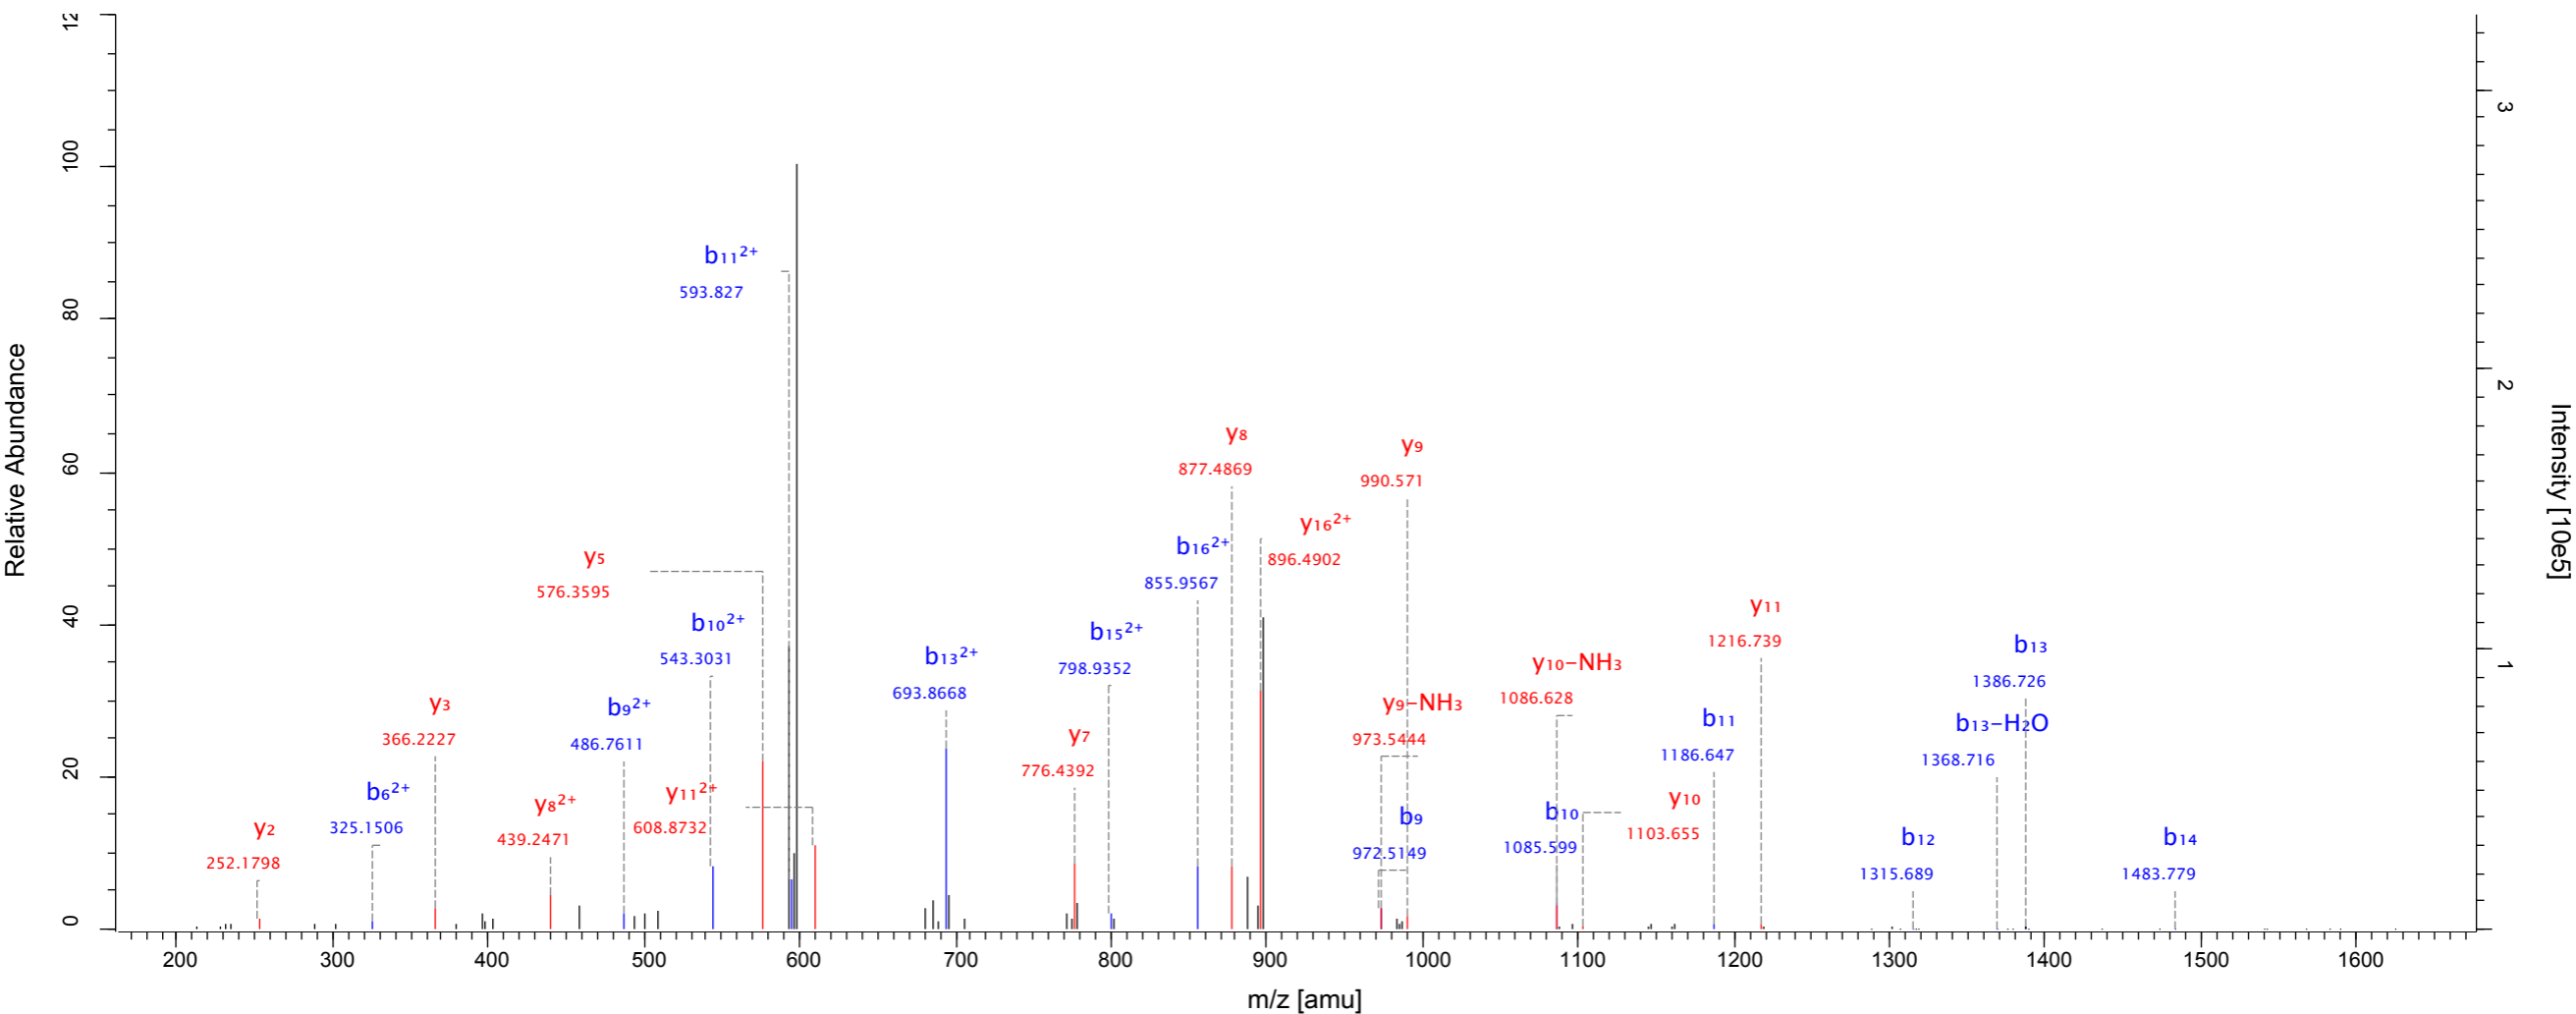

MS/MS spectrum

Source: F120118\_MC\_A2780\_DIR4  
 Protein: DPDE3  
 Peptide Score: 321.81  
 Method: ITMS; CID; 3

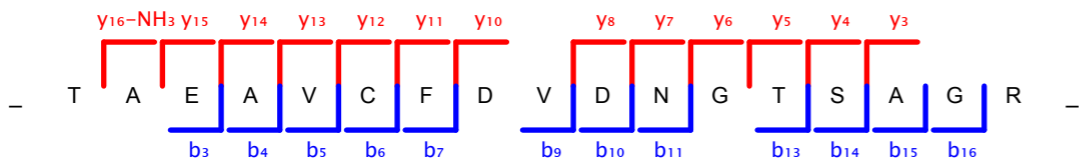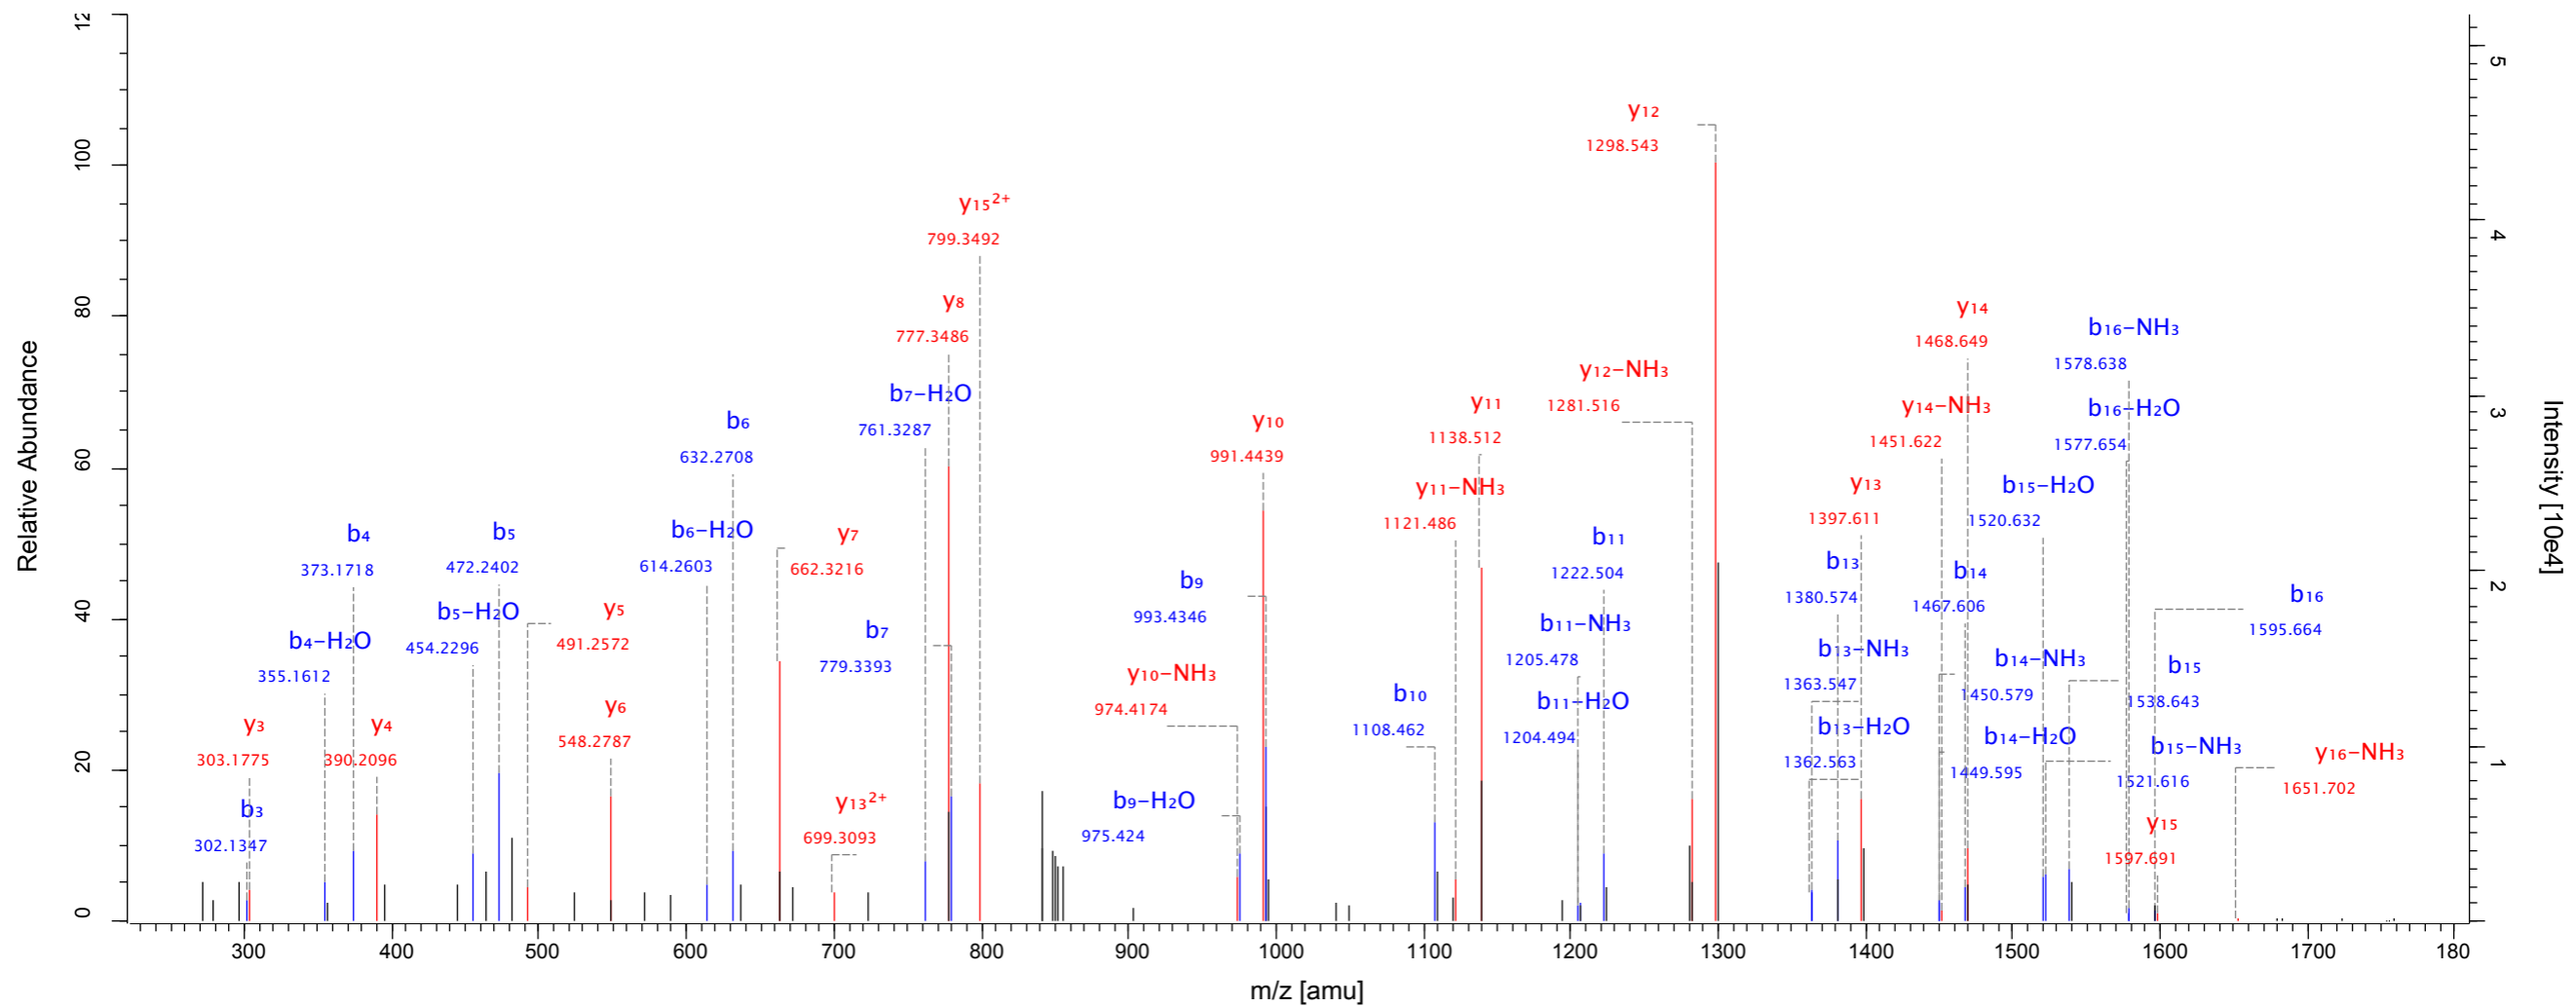

Supplemental Table S1

| Kinase  | IC <sub>50</sub>                                                                  |                                                                                     |
|---------|-----------------------------------------------------------------------------------|-------------------------------------------------------------------------------------|
|         | E-3810 (compound 1)                                                               | Compound 4                                                                          |
|         | 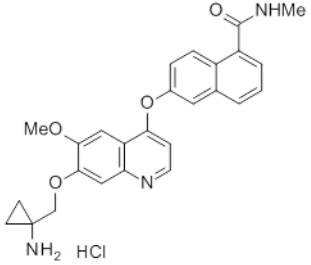 |  |
| c-KIT   | 437                                                                               | 526                                                                                 |
| FGFR-1  | 29                                                                                | 40                                                                                  |
| FGFR-2  | 77                                                                                | 130                                                                                 |
| FGFR-3  | 58                                                                                | 84                                                                                  |
| VEGFR-1 | 27                                                                                | 48                                                                                  |
| VEGFR-2 | 11                                                                                | 13                                                                                  |
| VEGFR-3 | n. a.                                                                             | n. a.                                                                               |



## Supplementary Table S2

| Gene Name | Uniprot ID | Protein Name                                                | Cluster Forward Experiment | Cluster Reverse Experiment |
|-----------|------------|-------------------------------------------------------------|----------------------------|----------------------------|
| PDGFRA    | P16234-1   | Platelet-derived growth factor receptor alpha               | 1                          | 1                          |
| CARDIAK   | O43353-1   | Receptor-interacting serine/threonine-protein kinase 2      | 1                          | 1                          |
| DDR2      | Q16832     | Discoidin domain-containing receptor 2                      | 1                          | 1                          |
| LYN       | Q6NUK7     | LYN protein                                                 | 1                          | 1                          |
| CSBP (2)  | Q16539-1   | Cytokine suppressive anti-inflammatory drug-binding protein | 2                          | 2                          |
| YES       | P07947     | Tyrosine protein kinase Yes                                 | 2                          | 2                          |
| SRC       | P12931-2   | Proto-oncogene tyrosine-protein kinase Src                  | 2                          | 2                          |
| EPHA2     | P29317     | Ephrin type-A receptor 2                                    | 2                          | 2                          |
| NMOR1     | P15559     | NAD(P)H dehydrogenase [quinone] 1                           | 2                          | 2                          |
| NMOR2     | P16083     | NAD(P)H dehydrogenase [quinone] 2                           | 2                          | 2                          |
| GBAS      | O75323     | Protein NipSnap homolog 2                                   | 2                          | 2                          |
| NIPSNAP1  | Q9BPW8     | Protein NipSnap homolog 1                                   | 2                          | 2                          |
| RIE2      | B3KWY9     | Highly similar to RING finger protein 10                    | n/a                        | 2                          |
| CSNK1E    | B3KRV2     | Casein kinase I isoform epsilon                             | 3                          | 2                          |
| MAP4K4    | O95819-3   | HPK/GCK-like kinase HGK                                     | 3                          | 3                          |
| UBF       | P17480-1   | Nucleolar transcription factor 1                            | 3                          | 3                          |
| TRDX      | P10599     | Thioredoxin                                                 | 3                          | 3                          |
| QPRT      | Q15274     | Nicotinate-nucleotide pyrophosphorylase [carboxylating]     | 3                          | 3                          |
| KIAA0197  | Q12769-1   | 160 kDa nucleoporin                                         | 3                          | 3                          |
| MTIF2     | P46199     | Translation initiation factor IF-2, mitochondrial           | 3                          | 3                          |
| RABGGTA   | Q92696     | Geranylgeranyl transferase type II subunit alpha            | 3                          | 3                          |
| CSBP (1)  | Q16539-2   | Cytokine suppressive anti-inflammatory drug-binding protein | n/a                        | n/a                        |
